# Supplementary material for: Vinyl sulfone silica: application of an open preactivated support to the study of transnitrosylation of plant proteins by S-nitrosoglutathione
Source: PubMed Central journal article supplement (PMC3639107; doi:10.1186/1471-2229-13-61), 2013-04-12
Supplement: 1471-2229-13-61-S1.pdf [file 1471-2229-13-61-S1.pdf]

**Figure S1. Synthesis of the S-nitrosoglutathione-vinyl sulfone silica.-** (i) reaction of vinyl silica with oxidized glutathione (GSSG) in 100 mM phosphate buffer pH 7.6 at rt; (ii-iii) blockage of the unreacted vinyl sulfone groups (VS) with  $\beta$ -mercaptoethanol (bETSH), generation of glutathione (GSH) and further reduction with DTT; (iv) S-nitrosylation by treatment with  $\text{NO}_2\text{Na}/\text{HCl}$  to yield S-nitrosoglutathione-vinyl sulfone silica

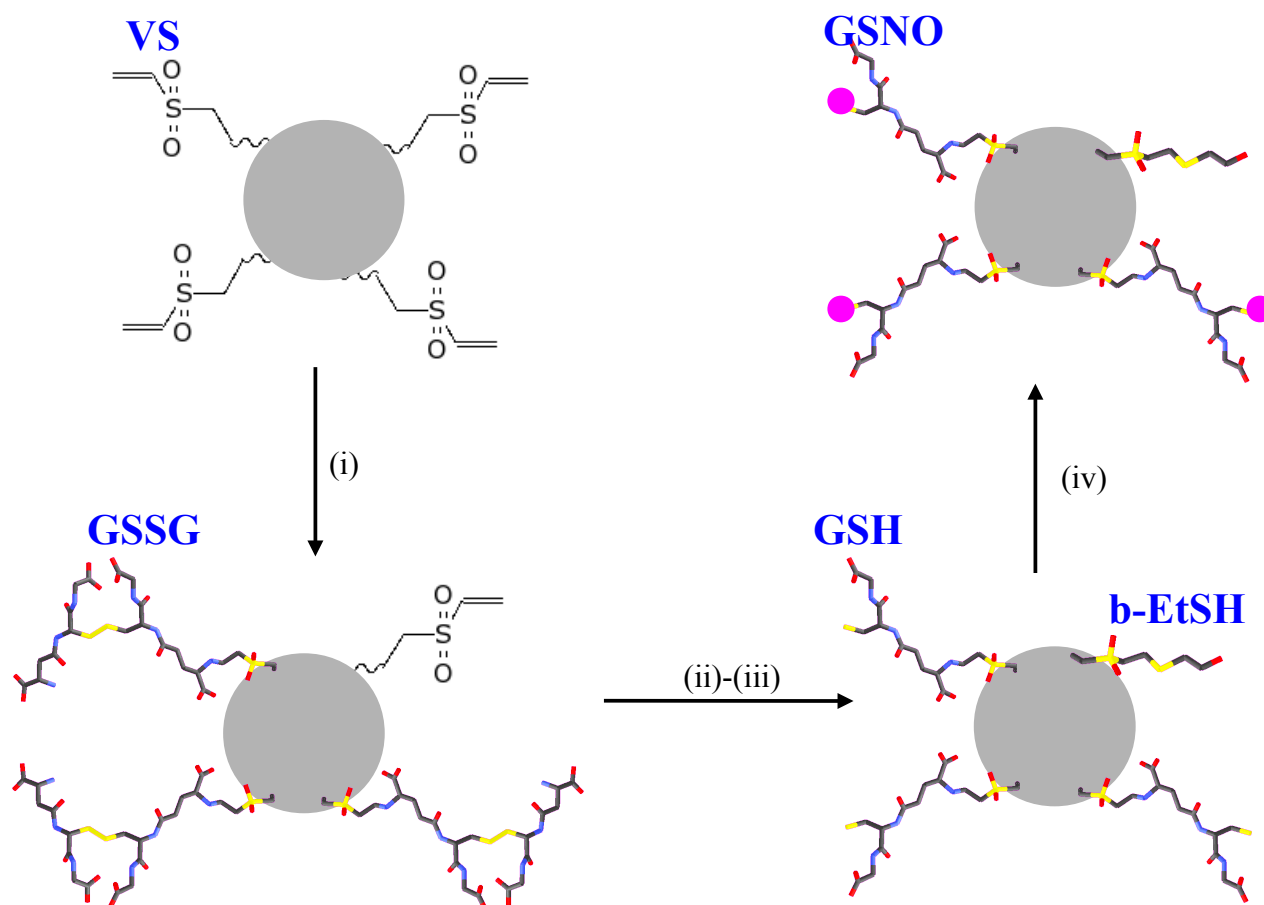

**Figure S2. Profile of the affinity chromatography of the pea leaves crude extract monitored at three wavelengths to detect both protein (A280) and S-nitrosothiol (A340 and A550) signal and the types of interactions that are disrupted (insert).-** A volume of 150 ml of crude extract of pea leaves in 50 mM HEPES pH 7.6 supplemented with 10 mM EDTA and 50 mM NaCl. After equilibration with 50 mM HEPES pH 7.6 with 50 mM NaCl to remove the non-bounded or weakly bounded proteins, the column was washed with 200 mM NaCl in the same buffer to discard those proteins retained by unspecific interactions and then eluted by increasing the ionic strength of the buffer to 1500 mM NaCl. Finally, the column was cleaned with 2000 mM NaCl and 100 mM DTT to removed those proteins that formed a disulfide bond with the resin.

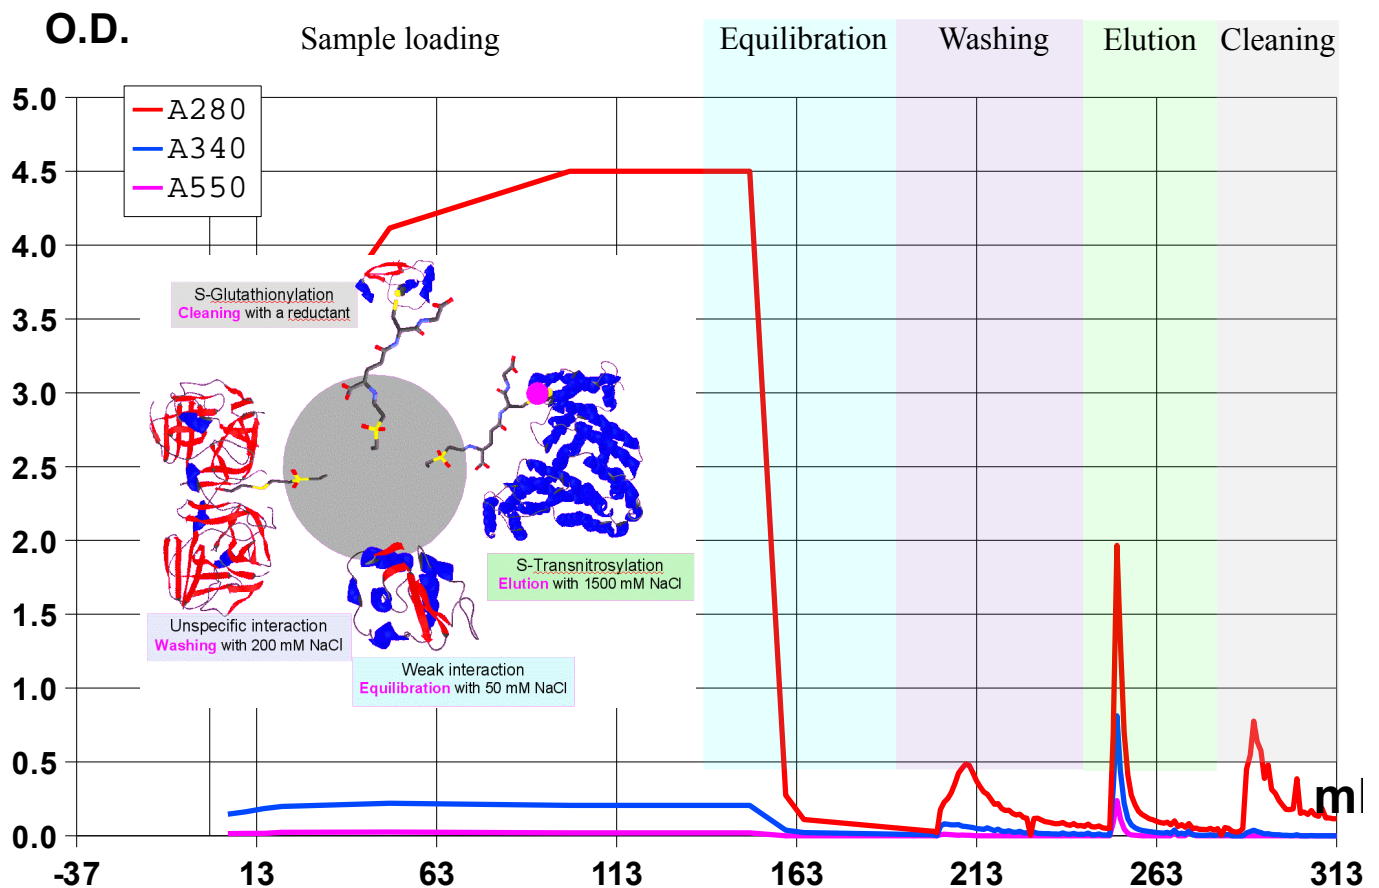

**Figure S3. Bidimensional electrophoresis of the peak fraction of pea leaves eluted at 1500 mM NaCl that showed the highest protein and S-nitrosothiol signal.** The gel was stained with Spypro Ruby. Molecular-mass standards are indicated on the left in kDa. Spots picked, digested with trypsin and analyzed by mass spectrometry are numbered.

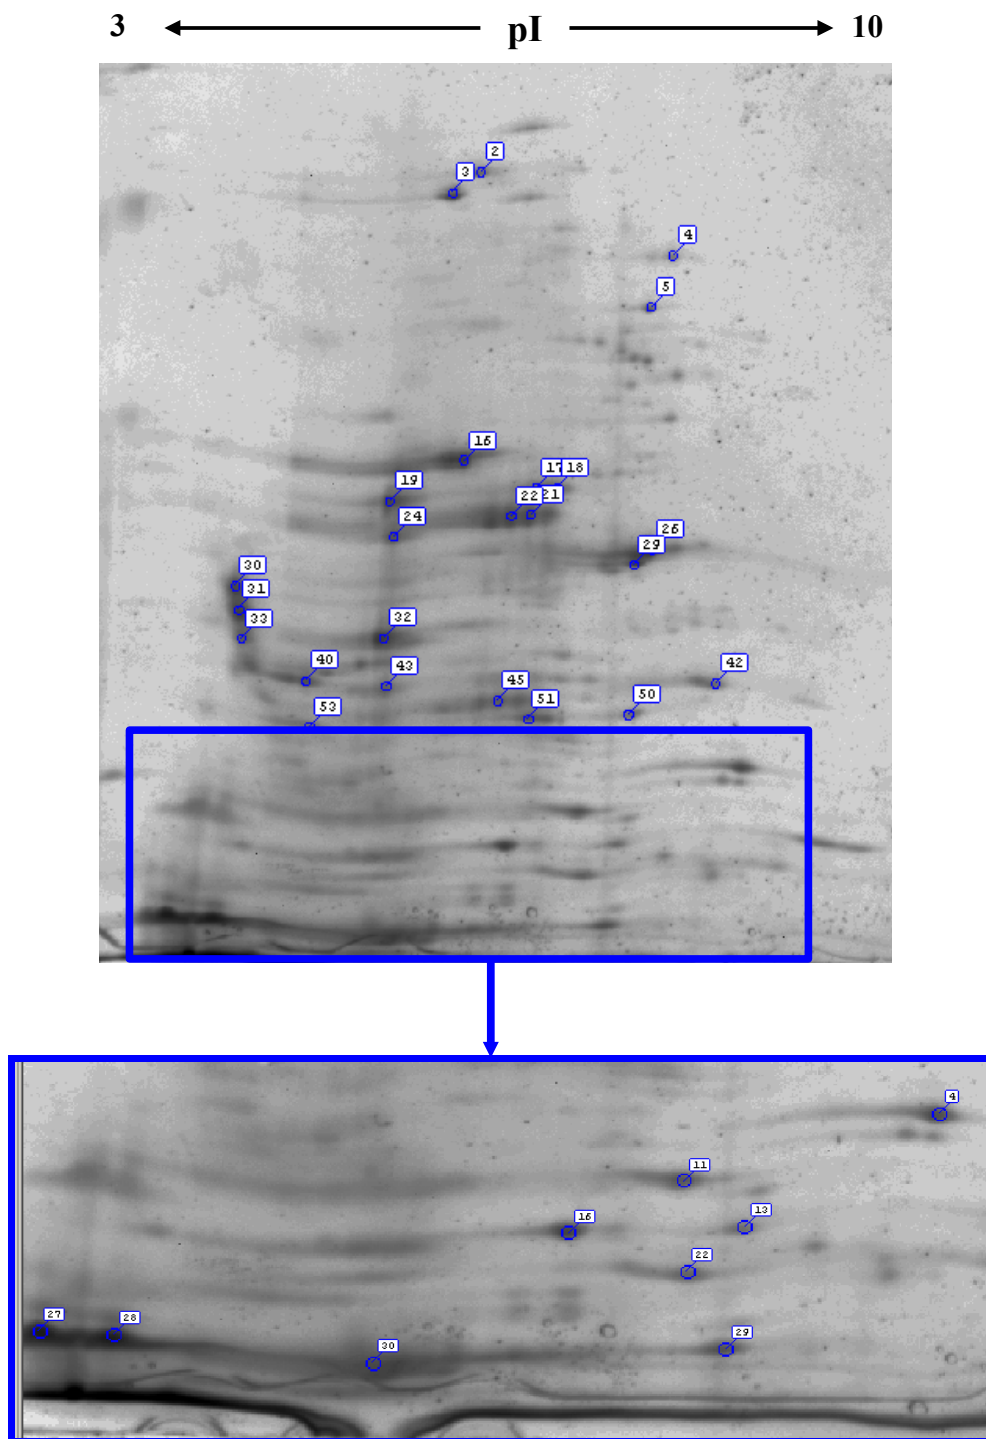

**Figure S4. Bidimensional electrophoresis of the peak fraction of sunflower hypocotyls eluted at 1500 mM NaCl.** (a) The gel was stained with Spypro Ruby. Molecular-mass standards are indicated on the left in kDa. (b) Spots that were picked, digested with trypsin and analyzed by mass spectrometry.

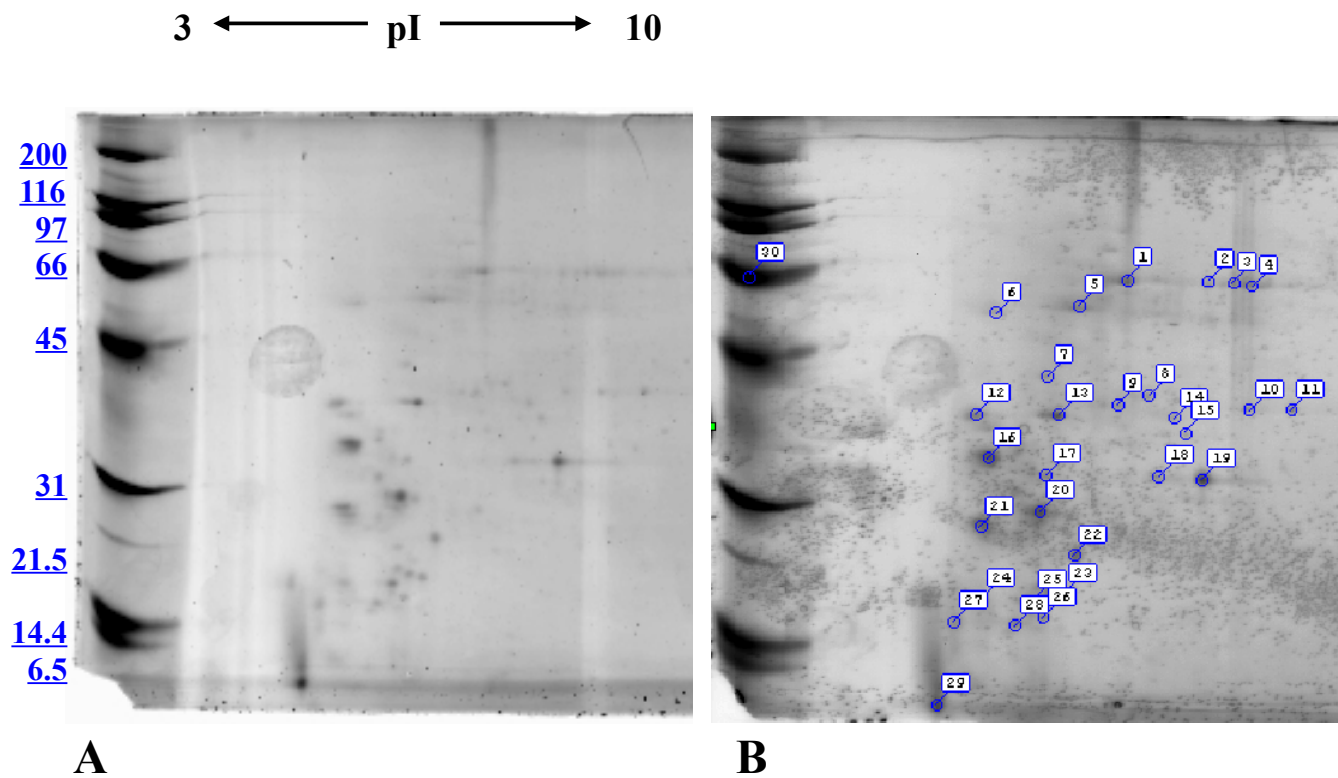

**Table S1. Summary of the positive identifications by mass spectrometry of the peak fraction of the pea leaf sample eluted from a GSNO-vinyl sulfone resin that showed the highest protein and S-nitrosylation signals.** Criteria to consider an identification as positive were: i) agreement between both molecular weight and isoelectric point inferred from the 2D gel and those reported in literature or predicted from the primary structure and ii) either fragmentation or mass fingerprint yielded a protein score C.I. better than 97% (instead of the less stringent 95% cutoff generally accepted). Peptides labeled as (\*) were confirmed by MS/MS

| spot | Protein score C.I.% | Peptide count | Protein species                                                          | MW (kDa) | pI   | ID     | identification method<br>matched peptides<br>[(*) Peptides identified by MS/MS]                                                                                                                                                                                                                             |
|------|---------------------|---------------|--------------------------------------------------------------------------|----------|------|--------|-------------------------------------------------------------------------------------------------------------------------------------------------------------------------------------------------------------------------------------------------------------------------------------------------------------|
| 5    | 7                   | 12            | <b>CRK1 protein.</b><br><i>Beta vulgaris subsp vulgaris</i>              | 66.7     | 9.26 | Q9LDC1 | <b>Peptide mass fingerprinting</b><br>KHPMTR<br>DISSRAR<br>NVVEGNEPK<br>RIITHANAK<br>IITHANAKSK<br>YPPSKEMDAK<br>FDNLEPESVK<br>LCGSPSDEYWK<br>MGCVFGKESLAPEGR<br>VDLPVADVVSQWDTGK<br>GVGQHWGSLVDPASAGGPR<br>DFPPSALSLLIDPAER                                                                                |
| 16   | 100                 | 15            | <b>Heat shock protein Hsp70</b><br><i>Medicago truncatula</i>            | 75.8     | 5.19 | Q1SKX2 | <b>MS/MS (total ion C.I.:%: 99.998%)</b><br>IAGLEVL<br>TPVENSLR<br>IPAVQELVK<br>DNKSLGSFR<br>DIDEVILVGGSTR<br>SFAAEEISAQVLR<br>SFAAEEISAQVLRK<br>AVVTVPAYFNDSQR (*)<br>QAVVNPENTFFSVK<br>SLGSFRLDGIPPAPR<br>AKFEELCSDLLDR<br>MSEVDEESKQVSYR<br>QAVVNPENTFFSVKR<br>IINEPTAASLAYGFER<br>LSIKDIDEVILVGGSTR (*) |
| 17   | 98.8                | 11            | <b>Inducer of CBF expression 1 protein</b><br><i>Populus suaveolens.</i> | 60.8     | 6.51 | Q1HIU3 | <b>Peptide mass fingerprinting</b><br>IMHLGIK<br>NLMAQWR<br>AVNIHMFCGR [oxidation M6]<br>AVNIHMFCGRK<br>GLPAKNLMAQWR<br>MQLNDRLYTMR<br>LDEISVNPLFSSR<br>LLSPLETYPHGR<br>GDQDSIKDLTFSPR<br>IMDQLCPSSLSPNGQPAR                                                                                                |

| spot | Protein score C.I.% | Peptide count | Protein species                                                                                         | MW (kDa) | pI   | ID     | identification method matched peptides<br>[(*) Peptides identified by MS/MS]                                                                                                                                                   |
|------|---------------------|---------------|---------------------------------------------------------------------------------------------------------|----------|------|--------|--------------------------------------------------------------------------------------------------------------------------------------------------------------------------------------------------------------------------------|
|      |                     |               |                                                                                                         |          |      |        | LLSPLETYPIHGRSATLRFQR                                                                                                                                                                                                          |
| 18   | 99.7                | 10            | <b>S-adenosyl-L-methionine:salicylic acid carboxyl methyltransferase</b><br><i>Arabidopsis thaliana</i> | 41.6     | 6.21 | Q9LS20 | <b>Peptide mass fingerprinting</b><br>LVPAFHK<br>MALTFVGR<br>NDFSLFLR<br>MALTFVGRK<br>CFISGVPGSFYSR<br>LFERYTYHLAER<br>RLASDAKPVVVETVK<br>NKPTVQFFVSLTRK<br>SITEPMLGAHFGDAIMDR<br>ASIIRSITEPMLGAHFGDAIMR                       |
| 19   | 100                 | 9             | <b>Chloroplastic Fructose-bisphosphatase</b><br>(with transit peptide)<br><i>Pisum sativum</i>          | 42,3     | 5.00 | P46275 | <b>MS/MS (total ion C.I.%: 99.998%)</b><br>HVNGSGVR<br>IYSFNEGNYK<br>YIGSLVGFHR<br>TLLYGGIYGYP<br>VLDIQPTEIHQR (*)<br>CVFDAKSVLSSSR<br>KLDVISNEVFSNCLR<br>VPLYIGSTEEVEKVEK<br>YIDDLKEPGPSGKPYSAR (*)                           |
| 21   | 100                 | 11            | <b>Phosphoribulokinase</b><br><i>Pisum sativum</i>                                                      | 39.2     | 5.40 | P93681 | <b>MS/MS (total ion C.I.%: 100)</b><br>LIQKAGVK<br>GHSLESIK<br>FFYGPETYK (*)<br>DLFEQIVASR<br>FYGEVTQQMLK (*)<br>RLTSVFGGAAEPPK<br>IRDLFEQIVASR<br>KPDFEAYIDPQK<br>ANDFDLMYEQVK (*)<br>ILVIEGLHPMYDSR<br>HADFPGSNNGTGLFQTIVGLK |
| 24   | 100                 | 9             | <b>Chloroplastic Fructose-bisphosphatase</b><br>(mature protein)<br><i>Pisum sativum</i>                | 35.3     | 5.02 | P46275 | <b>MS/MS (total ion C.I.%: 100)</b><br>QIASLVQR<br>ANISNLTEDQK<br>IYSFNEGNYK<br>EPGPSGKPYSAR<br>YIGSLVGFHR (*)<br>TLLYGGIYGYP (*)<br>VLDIQPTEIHQR<br>VPLYIGSTEEVEKVEK<br>YIDDLKEPGPSGKPYSAR (*)                                |
| 26   | 100                 | 7             | <b>Hypothetical protein</b><br>(predicted as chloroplastic)<br><i>Arabidopsis thaliana</i>              | 42.8     | 8.19 | Q9SA52 | <b>MS/MS (total ion C.I.%: 100)</b><br>ILIMGGTR<br>KILIMGGTR<br>EGHQVTLFTR<br>DQHFFASVEK<br>GALYVSASSEKK                                                                                                                       |

| spot | Protein score C.I.% | Peptide count | Protein species                                                                        | MW (kDa) | pI   | ID     | identification method matched peptides<br>[(*) Peptides identified by MS/MS]                                                                                                                 |
|------|---------------------|---------------|----------------------------------------------------------------------------------------|----------|------|--------|----------------------------------------------------------------------------------------------------------------------------------------------------------------------------------------------|
|      |                     |               |                                                                                        |          |      |        | AGGFPEPEIVHYNPK<br>SSLSAEGFDVVYDINGR (*)                                                                                                                                                     |
| 29   | 97.1                | 9             | <b>Putative F-box protein</b><br><i>Arabidopsis thaliana</i>                           | 38.1     | 9.80 | Q9FVT4 | <b>Peptide mass fingerprinting</b><br>ADNSATRVR<br>WTEFAMSR<br>VKALTLEMK<br>LESGSMLELK<br>MADNSATRVR<br>GVPFPMFKVK<br>NVENMSLDVR<br>MMNFHLKINK<br>SLSHRLDLHDVIPR                             |
| 42   | 100                 | 9             | <b>Ferredoxin:nadp+ reductase</b><br>(with transit peptide)<br><i>Pisum sativum</i>    | 40.2     | 8.60 | P10933 | <b>MS/MS (total ion C.I.%: 100)</b><br>MYIQTR<br>FKPKPEYVGR<br>GIDDIMVSLAAK<br>LVYTNDAGEVVK (*)<br>RLVYTNDAGEVVK<br>KDNTFVYMCGLK<br>APENFRLDFAVSR<br>LYSIASSAIGDFGDSK<br>DPNATVIMLGTGTGIAPFR |
| 43   | 100                 | 8             | <b>Chloroplatic Fructose-bisphosphatase</b><br>(nicked form)<br><i>Pisums sativum,</i> | 34.0     |      | P46275 | <b>MS/MS (total ion C.I.%: 100)</b><br>SVLSSRR<br>IYSFNEGNYK<br>EPGPSGKPYSAR<br>YIGSLVGDFHR (*)<br>TLLYGGIYGYP<br>VLDIQPTEIHQR<br>VPLYIGSTEEVEK<br>YIDDLKEPGPSGKPYSAR (*)                    |
| 45   | 98.8                | 8             | <b>GTP-binding protein</b><br><i>Pisums sativum,</i>                                   | 25.0     | 5.70 | Q08147 | <b>Peptide mass fingerprinting</b><br>NIVILVGNK<br>STIGVEFQTR<br>ANSGGYGDANQR<br>FSRNEFSLDSK<br>MANSGGYGDANQR<br>DVPTEDAKEFAEK<br>GAVGAMLVYDITKR<br>SDLENQRDVPTEDAK                          |
| 50   | 100                 | 8             | <b>ferredoxin: nadp+reductase</b><br>(mature protein)<br><i>Pisum sativum</i>          | 33.0     | 6.06 | P10933 | <b>MS/MS (total ion C.I.%: 100)</b><br>DGIDWLEFK<br>GIDDIMVSLAAK<br>LVYTNDGGEIVK<br>ITGPVGKEMLMPK<br>RLVYTNDGGEIVK<br>LGFSVSREQTNEK<br>QEEGIVVNKFKPK<br>LYSIASSAIGDFGDSK (*)                 |

| spot                          | Protein score C.I.% | Peptide count | Protein species                                                         | MW (kDa) | pI   | ID     | identification method matched peptides<br>[(*) Peptides identified by MS/MS]                                                                                                                             |
|-------------------------------|---------------------|---------------|-------------------------------------------------------------------------|----------|------|--------|----------------------------------------------------------------------------------------------------------------------------------------------------------------------------------------------------------|
| 51                            | 100                 | 6             | <b>26S proteasome alpha-3 chain</b><br><i>Spinacia oleracea</i>         | 27.5     | 6.11 | O24362 | <b>MS/MS (total ion C.I.%: 99.999)</b><br>YFGAAIGK<br>MMLPGSNR<br>VFQIEYAAK (*)<br>MMLPGSNRR<br>CKDGIVLGVEK<br>HSGMAVAGLAADGR                                                                            |
| <b>Bottom part of the gel</b> |                     |               |                                                                         |          |      |        |                                                                                                                                                                                                          |
| 4                             | 100                 | 8             | <b>Proteasome subunit alpha type-7</b><br><i>Cicer arietinum</i>        | 27.2     | 6.86 | Q9SXU1 | <b>MS/MS (total ion C.I.%: 99.871%)</b><br>KGNAAVGVR<br>YIAGLQQK (*)<br>NIEVAVMTK<br>ALLEVVESGGK<br>GTDNVVLGVEK<br>GTDNVVLGVEKK<br>NSNSIREFLEK<br>NFKETSGQETVK                                           |
| 11                            | 100                 | 10            | <b>Proteasome subunit alpha type-6</b><br><i>Glycine max</i>            | 27.5     | 5.83 | O48551 | <b>MS/MS (total ion C.I.%: 100)</b><br>TLVQQAR<br>NEAAEFR<br>AAGITSIGVR<br>LFQVEYAFK (*)<br>HITIFSPEGR<br>DQEAINFLEK<br>YLGLLATGMTADAR<br>ATSAGLKDQEAINFLEK (*)<br>VLTTEIDEHLTAISER<br>VLTTEIDEHLTAISERD |
| 16                            | 100                 | 7             | <b>Proteasome subunit alpha type-2-A</b><br><i>Arabidopsis thaliana</i> | 25.7     | 5.53 | O23708 | <b>MS/MS (total ion C.I.%: 100)</b><br>EPIPVTQLVR<br>NIEIGKIGADK<br>ASAMGKNVSNK<br>LPSILVDEASVQK<br>KLPSILVDEASVQK (*)<br>LYKEPIPVTQLVR (*)<br>LVQIEHALTAVGSGQTSGLIK                                     |
| 29                            | 100                 | 6             | <b>Putative beta4 proteasome subunit</b><br><i>Nicotiana tabacum</i>    | 14.6     | 6.40 | Q93X32 | <b>MS/MS (total ion C.I.%: 97.36)</b><br>GELATALR<br>IMILDCHK<br>GELATALRK<br>NVALYQFR (*)<br>LMGASGEAGDR<br>NGIPLTTAAAANFTR                                                                             |



**Table S2. Summary of the positive identifications by mass spectrometry of the peak fraction of the sunflower hypocotyls sample eluted from a GSNO-vinyl sulfone resin that showed the highest protein and S-nitrosylation signals.** Criteria to consider an identification as positive were: i) agreement between both molecular weight and isoelectric point inferred from the 2D gel and those reported in literature or predicted from the primary structure and ii) either fragmentation or mass fingerprint yielded a protein score C.I. better than 97% (instead of the less stringent 95% cutoff generally accepted). Peptides labeled as (\*) were confirmed by MS/MS

| spot | Protein score C.I.% | Peptide count | Protein species                                                     | MW (kDa) | pI   | ID     | identification method<br>matched peptides<br>[(*) Peptides identified by MS/MS]                                                                                                                                                              |
|------|---------------------|---------------|---------------------------------------------------------------------|----------|------|--------|----------------------------------------------------------------------------------------------------------------------------------------------------------------------------------------------------------------------------------------------|
| 3    | 99.8                | 12            | <b>Ferredoxin-nitrite reductase</b><br><i>Spinacia oleracea</i>     | 67.1     | 6.51 | P05314 | <b>Peptide mass fingerprinting</b><br>DLGFRGNR<br>NNSIRCQK<br>RMPEQVLER<br>IADVYGSSELK<br>HHYGRFMMR<br>LQADEMEELAR<br>ERYSPEPPILMK<br>IDSLLEPLLKER<br>MMWLIDELGMEAFR<br>VTEEVQRLVSVTRPVR<br>LFIEDGISDLATLSMEEVDK<br>AVSPAAETA AVSPSVDAARLEPR |
| 4    | 97.6                | 9             | <b>Transcriptional adapter ADA2b</b><br><i>Arabidopsis thaliana</i> | 56.1     | 6.05 | Q9ATB4 | <b>Peptide mass fingerprinting</b><br>KAEQNMK<br>EEYFSPPK<br>ENEEGMNRGK<br>NLLYPNPFK<br>VDRVYDMLVK<br>EEYFSPPKVK<br>ENDTPEEHELK<br>RLFSQDMSHVAGK<br>FHSKEEHDELLR                                                                             |
| 16   | 99.9                | 11            | <b>Expressed protein</b><br><i>Oryza sativa</i>                     | 43.0     | 5.72 | Q2QWE0 | <b>Peptide mass fingerprinting</b><br>TMLVEEK<br>LPDCTFGKK<br>TMLSEEKVK<br>LKTMLSEEK<br>LKTMLVEEK<br>TMLVEEKDK<br>LLKTIFVEEK<br>NEHYKTMLAK<br>NMLEEEKDNNK<br>AVEVIQTSSEVK<br>AEHHKNMLEEEK                                                    |
| 18   | 99.9                | 10            | <b>At2g18860</b><br><i>Arabidopsis thaliana</i>                     | 34.0     | 5.87 | Q501A1 | <b>Peptide mass fingerprinting</b><br>WQLEEFK<br>ETLVAQIEATPK<br>IWSSPNFNLSR<br>MNVNSFDLWQK                                                                                                                                                  |

| spot | Protein score C.I.% | Peptide count | Protein species                                                                                | MW (kDa) | pI   | ID     | identification method matched peptides<br>[(*) Peptides identified by MS/MS]                                                                                                                                                                         |
|------|---------------------|---------------|------------------------------------------------------------------------------------------------|----------|------|--------|------------------------------------------------------------------------------------------------------------------------------------------------------------------------------------------------------------------------------------------------------|
|      |                     |               |                                                                                                |          |      |        | WQLEEFKAVR<br>QFVTAIENQIHR<br>MMVVNSFDLWQK<br>ESTNSSLVENVMEVSAK (oxid. M12)<br>SRESTNSSLVENVMEVSAK<br>ESTNSSLVENVMEVSAK                                                                                                                              |
| 19   | 99.9                | 11            | <b>Pentatricopeptide repeat-containing protein-like protein</b><br><i>Arabidopsis thaliana</i> | 42.0     | 8.81 | Q9CAY8 | <b>Peptide mass fingerprinting</b><br>WGLKYR<br>EKGMVEK<br>LWNEYK<br>AEKLMTR<br>YLDRASR<br>LMTRWGLK<br>MSMTLSLQR<br>VDESLREMK<br>LCSKACIGDK<br>FLADWEGTVK<br>NGTLSTNQTLHGR                                                                           |
| 20   | 99.6                | 10            | <b>Hypothetical protein At2g46320</b><br><i>Arabidopsis thaliana</i>                           | 39.3     | 9.37 | Q8S8M6 | <b>Peptide mass fingerprinting</b><br>AMTMTR<br>QIEKNTDR<br>MQAFKGTQR<br>SKSIPNENLK<br>GMFSGAGARVGR<br>NTDRAMTMTR<br>MLWTGLGAQLAR<br>MVEEAQLDPKSK<br>ITGSASVCSDNQYK<br>QTLAEIWRDGGMR                                                                 |
| 21   | 100                 | 14            | <b>Ferredoxin-nitrite reductase precursor (fragment)</b><br><i>Spinacia oleracea</i>           | 67.1     | 6.51 | P05314 | <b>Peptide mass fingerprinting</b><br>SGINPAEK<br>AMLEAFR<br>DGFWVLK<br>LEPRVEER<br>EYLGVHPQK<br>NNSIRCQK<br>RMPEQVLER<br>HHYGRFMMR<br>IDSLLEPLLK<br>LQADEMEELAR<br>ERYSPEPPILMK<br>MPEQVLERASSEELVQK<br>LFIEDGISDLATLSMEEVDK<br>MMWLIDELGMEAFRGEVEK |
| 22   | 99.9                | 4             | <b>Pectinesterase</b><br><i>Solanum tuberosum</i>                                              | 24.4     | 8.84 | Q43838 | <b>MS/MS (total ion C.I.%: 99.977)</b><br>ENVEVTSRK<br>CQLVARKPSK<br>YQKNMVTAQGR<br>IDAYQDTLYAHSQR (*)                                                                                                                                               |
| 24   | 98.7                | 7             | <b>Catalase 1 (fragment)</b>                                                                   | 34.2     | 5.9  | Q93XK3 | <b>Peptide mass fingerprinting</b>                                                                                                                                                                                                                   |

| spot | Protein score C.I.% | Peptide count | Protein species                                                   | MW (kDa) | pI   | ID     | identification method matched peptides<br>[(*) Peptides identified by MS/MS]                                                                                |
|------|---------------------|---------------|-------------------------------------------------------------------|----------|------|--------|-------------------------------------------------------------------------------------------------------------------------------------------------------------|
|      |                     |               | <i>Pinus pines</i>                                                |          |      |        | FPDMVHALKPNPK<br>HMDGSGVHTFTLVNK<br>DGMKFPDMVHALKPNPK<br>TWPEDIFPLQPVGRMVLNK<br>GFFEVDHSHLTCADFLR<br>EGNFDLVGNNFPVFFVRDGMK<br>ILDFFSHHPESLHMFTFLFDDLGIPLNYR |
| 25   | 98                  | 4             | <b>Thioredoxin peroxidase</b><br><i>Nicotinum tabacum</i>         | 30.1     | 8.2  | Q8RVF8 | <b>MS/MS (total ion C.I.%: 99.407)</b><br>SVDETLR<br>SYNVLIPDQGIALR (*)<br>SGGLGDLNYPLISDVTK<br>EGVIQHSTINNLGIGRSVDETLR                                     |
| 26   | 99.7                | 6             | <b>Cytochrome P450</b><br>(fragment)<br><i>Teucrium canadense</i> | 14.6     | 6.06 | Q5EKR9 | <b>Peptide mass fingerprinting</b><br>GSNVHVNWALAR<br>SNANVKIGGYDIPK<br>AQEEMDRVIGYER<br>TSTTMEWAMTELIK<br>FLEEDVDMKGHDFR<br>IGGYDIPKGSNVHVNWALAR           |
| 29   | 99.8                | 3             | <b>Calmodulin</b><br><i>Arabidopsis thaliana</i>                  | 15.6     | 4.20 | P25069 | <b>MS/MS (total ion C.I.%: 99.836)</b><br>LTDEEVDEMIK<br>DTDSEELKEAFR<br>VFDKQNGFISAAELR (*)                                                                |
